# Supplementary material for: Impact of Amyloid-β on Platelet Mitochondrial Function and Platelet–Mediated Amyloid Aggregation in Alzheimer’s Disease
Source: MDPI journal article supplement (doi:10.3390/ijms22179633), 2021-09-06
Supplement: s1 [file s1]

## Supplemental Figures

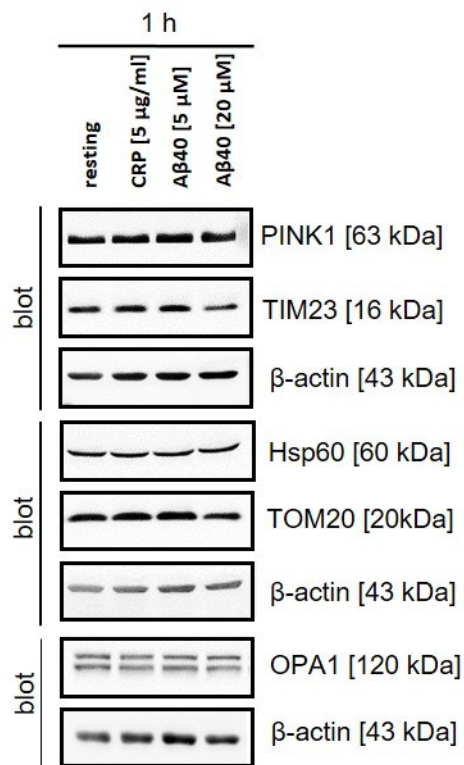

**Figure S1: Expression levels of mitochondrial proteins in platelets upon Aβ40 stimulation.** Human platelets were stimulated with 5 µM or 20 µM Aβ40 or 5 µg/ml CRP for 1 h. Using western blot analysis the expression levels of mitochondrial proteins as indicated were detected. β-actin served as loading control (n=4).

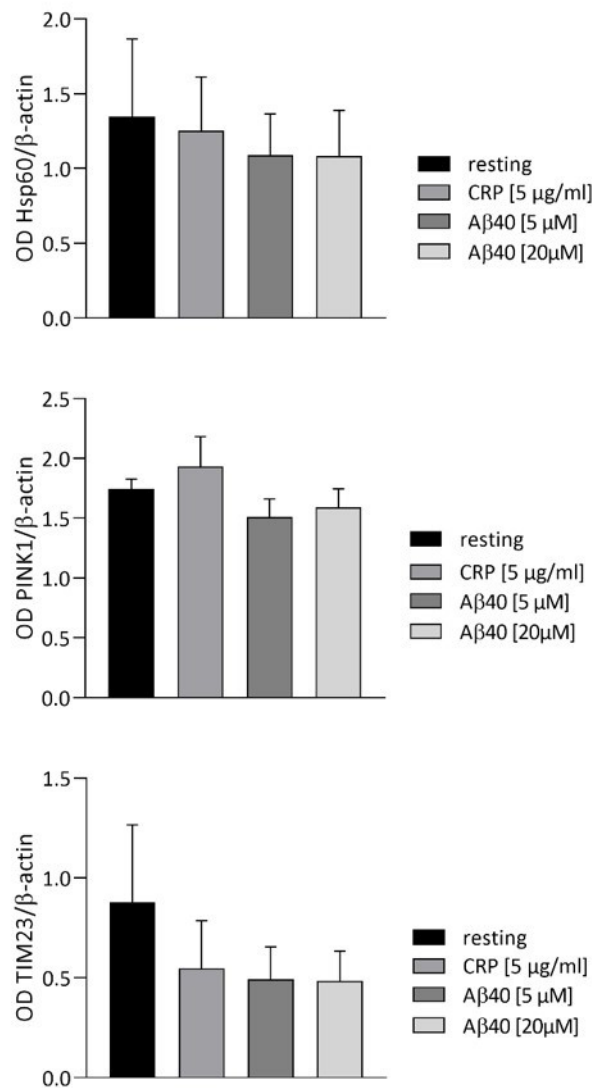

**Figure S2: Quantification of expression levels of mitochondrial proteins in platelets upon Aβ40 stimulation.** Human platelets were stimulated with 5 μM or 20 μM Aβ40 or 5 μg/ml CRP for 2 h. Using western blot analysis the expression levels of mitochondrial proteins were detected. β-actin served as loading control. The intensity of bands were analyzed with ImageJ software. Data show the mean value ± SEM (n=4-5).

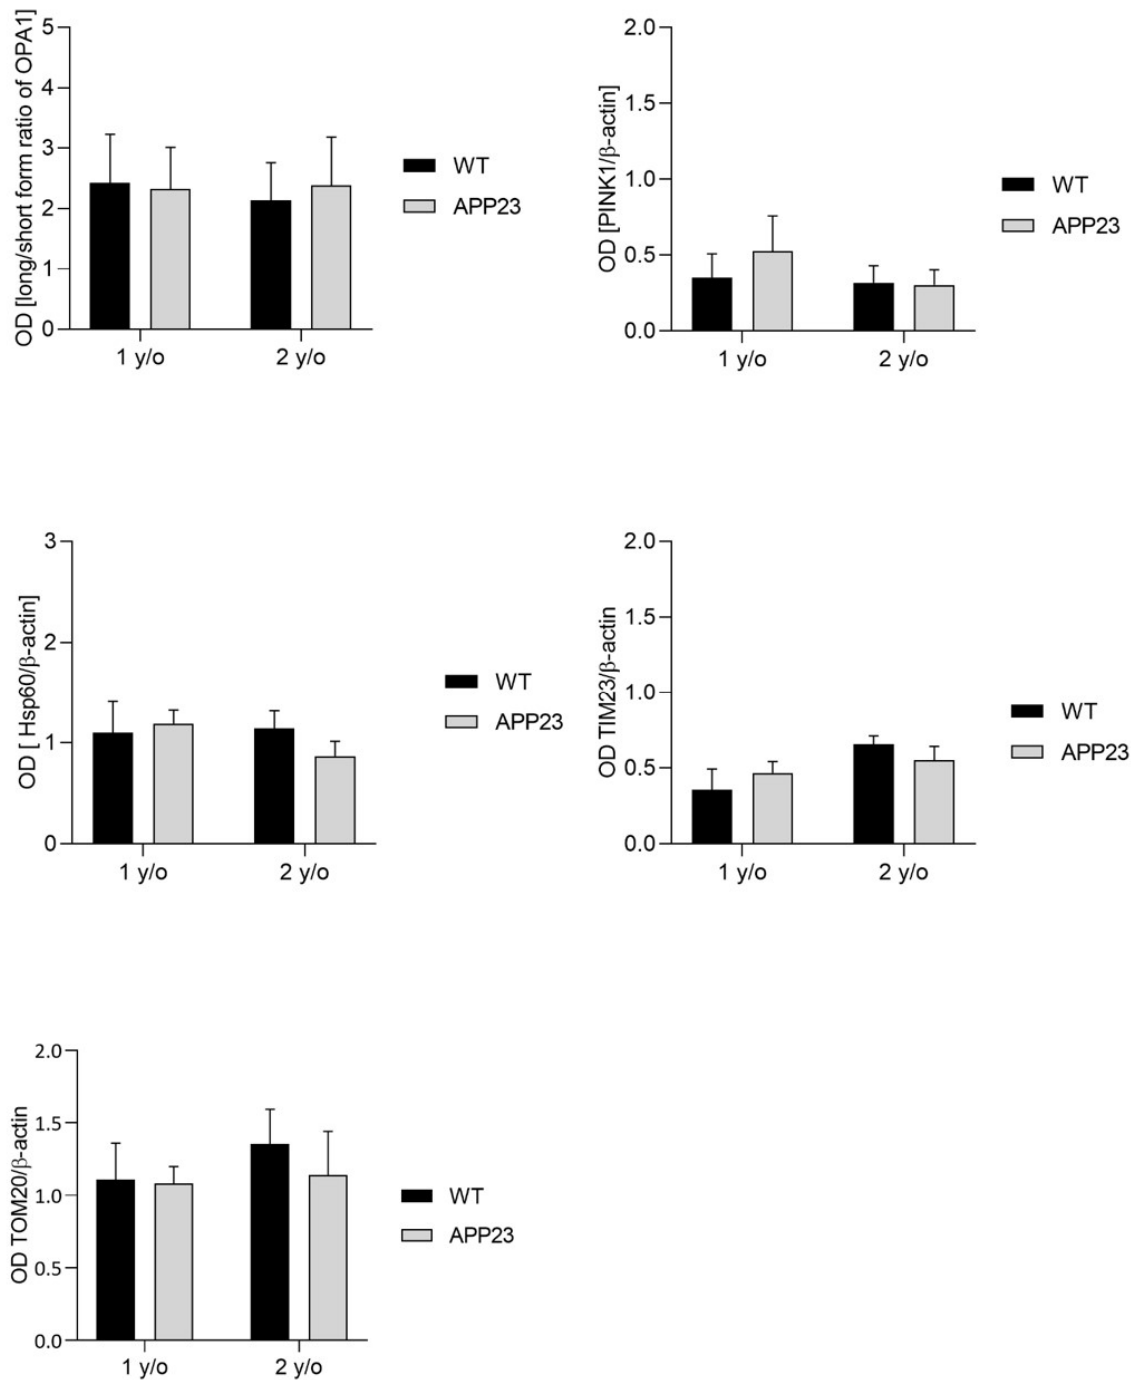

**Figure S3:** The expression level of mitochondrial proteins in platelets from one year and two year old WT and APP23 mice were quantified by ImageJ software and normalized by the expression of  $\beta$ -actin. Data show the mean value  $\pm$  SEM (n=4-5).

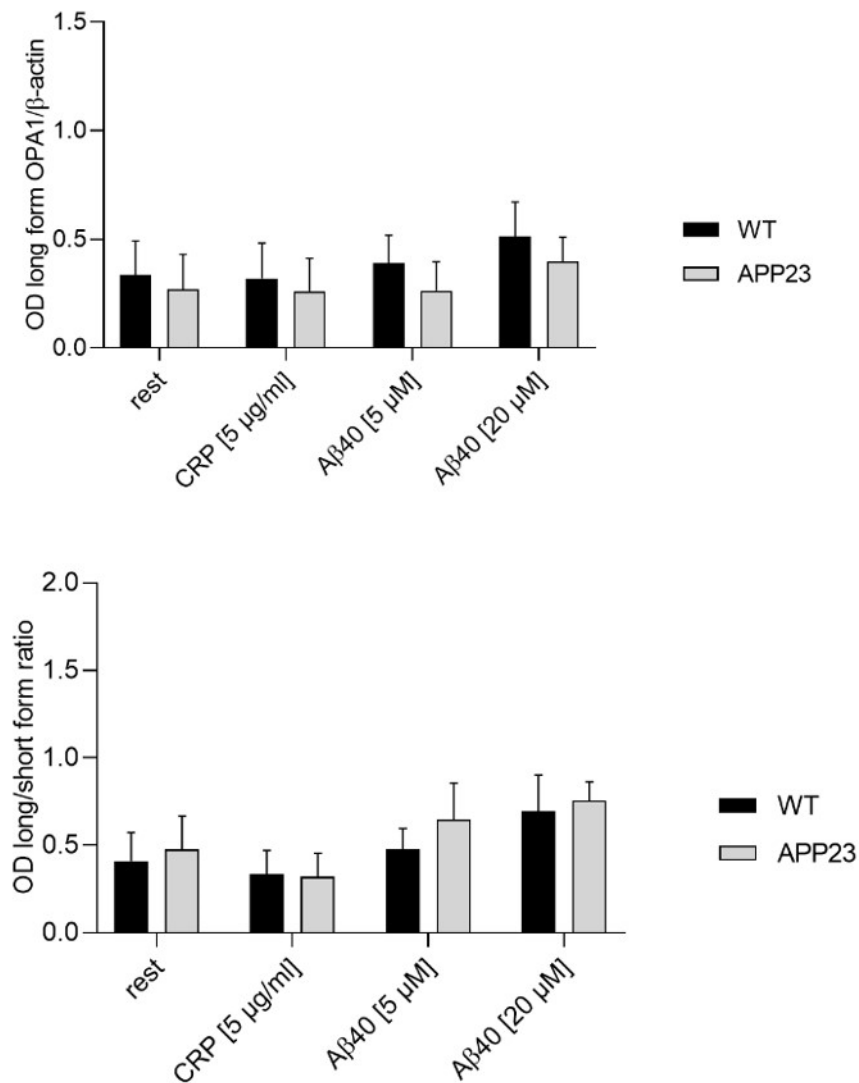

**Figure S4:** The expression level of mitochondrial protein OPA 1 in platelets from two year old WT and APP23 mice as indicated were determined using Western blot analysis.  $\beta$ -actin served as loading control. The grayscale values of the bands were analyzed with ImageJ software. Data show the mean value  $\pm$  SEM (n=4-5).
